# Supplementary material for: Variation in population levels of sedentary time in European children and adolescents according to cross-European studies: a systematic literature review within DEDIPAC
Source: PubMed Central journal article supplement (PMC4924322; doi:10.1186/s12966-016-0395-5), 2016-06-28
Supplement: 12966_2016_395_MOESM4_ESM.pdf [file 12966_2016_395_MOESM4_ESM.pdf]

|                               |   |   |   |   |   |   |   |   |   |   |   |   |             |
|-------------------------------|---|---|---|---|---|---|---|---|---|---|---|---|-------------|
| [39]                          |   |   |   |   |   |   |   |   |   |   |   |   |             |
| Janssen et al. (2005) [40]    | 2 | 2 | 2 | 1 | 2 | 2 | 2 | 2 | 2 | 2 | 2 | 2 | <b>0.95</b> |
| Kuntsche et al. (2006) [41]   | 1 | 2 | 2 | 1 | 2 | 2 | 2 | 2 | 2 | 2 | 2 | 2 | <b>0.91</b> |
| Richter et al. (2009) [42]    | 2 | 2 | 2 | 1 | 2 | 2 | 2 | 2 | 2 | 2 | 2 | 2 | <b>0.95</b> |
| Vereecken et al. (2006) [43]  | 2 | 2 | 2 | 0 | 2 | 2 | 2 | 2 | 2 | 2 | 2 | 2 | <b>0.91</b> |
| HBSC report 2004 [44]         | 1 | 2 | 2 | 2 | 2 | 2 | 1 | 0 | 0 | 2 | 2 | 2 | <b>0.73</b> |
| Haug et al. (2009) [45]       | 2 | 2 | 2 | 2 | 2 | 2 | 2 | 2 | 2 | 2 | 2 | 2 | <b>1.00</b> |
| Torsheim et al. (2010) [46]   | 2 | 2 | 2 | 0 | 2 | 2 | 2 | 2 | 2 | 2 | 2 | 2 | <b>0.91</b> |
| HBSC report 2008 [47]         | 1 | 2 | 2 | 2 | 2 | 2 | 1 | 0 | 0 | 1 | 2 | 2 | <b>0.68</b> |
| Nuutinen et al. (2015) [48]   | 2 | 2 | 2 | 2 | 2 | 2 | 2 | 2 | 2 | 2 | 2 | 2 | <b>1.00</b> |
| HBSC report 2012 [49]         | 1 | 2 | 2 | 2 | 2 | 2 | 1 | 0 | 0 | 1 | 2 | 2 | <b>0.68</b> |
| Bucksch et al. (2016) [50]    | 2 | 2 | 1 | 1 | 2 | 2 | 2 | 0 | 2 | 2 | 2 | 2 | <b>0.82</b> |
| HBSC report 2016 [51]         | 1 | 2 | 2 | 2 | 1 | 2 | 1 | 0 | 0 | 1 | 2 | 2 | <b>0.64</b> |
| Atkin et al. (2014) [52]      | 2 | 1 | 1 | 1 | 1 | 2 | 2 | 2 | 2 | 2 | 2 | 2 | <b>0.82</b> |
| Ekelund et al. (2012) [53]    | 2 | 1 | 1 | 2 | 2 | 2 | 2 | 2 | 2 | 2 | 2 | 2 | <b>0.91</b> |
| Hildebrand et al. (2015) [54] | 1 | 2 | 1 | 2 | 2 | 2 | 2 | 2 | 2 | 2 | 2 | 2 | <b>0.91</b> |
| Hense et al. (2011) [55]      | 2 | 2 | 2 | 2 | 0 | 2 | 2 | 2 | 2 | 2 | 2 | 2 | <b>0.91</b> |
| Hunsberger et al. (2012) [56] | 2 | 2 | 1 | 2 | 0 | 2 | 2 | 2 | 2 | 2 | 2 | 2 | <b>0.86</b> |
| Kovács et al. (2015) [57]     | 2 | 2 | 2 | 1 | 2 | 2 | 2 | 2 | 2 | 2 | 2 | 2 | <b>0.95</b> |
| Mitchell et al. (2013) [58]   | 1 | 2 | 1 | 1 | 2 | 2 | 2 | 2 | 2 | 2 | 2 | 2 | <b>0.86</b> |
| Katzmaryk et al. (2015) [59]  | 2 | 2 | 2 | 2 | 2 | 2 | 2 | 2 | 2 | 1 | 2 | 2 | <b>0.95</b> |

|                                |           |           |           |           |           |           |           |           |           |           |           |             |
|--------------------------------|-----------|-----------|-----------|-----------|-----------|-----------|-----------|-----------|-----------|-----------|-----------|-------------|
| LeBlanc et al. (2015) [60]     | 2         | 2         | 1         | 2         | 2         | 2         | 2         | 2         | 2         | 2         | 2         | <b>0.95</b> |
| Klepp et al. (2007) [61]       | 2         | 2         | 2         | 2         | 2         | 2         | 2         | 2         | 2         | 2         | 2         | <b>1.00</b> |
| te Velde et al. (2007) [62]    | 2         | 2         | 2         | 1         | 2         | 2         | 2         | 2         | 2         | 2         | 2         | <b>0.95</b> |
| De Craemer et al. (2015) [63]  | 2         | 2         | 2         | 1         | 2         | 2         | 2         | 2         | 2         | 2         | 2         | <b>0.95</b> |
| van Stralen et al. (2012) [64] | 2         | 2         | 1         | 2         | 1         | 2         | 2         | 2         | 2         | 2         | 2         | <b>0.91</b> |
| <b>Total</b>                   | <b>74</b> | <b>82</b> | <b>71</b> | <b>70</b> | <b>73</b> | <b>75</b> | <b>78</b> | <b>74</b> | <b>70</b> | <b>81</b> | <b>84</b> | <b>0.91</b> |

Since items 5 (random allocation), 6 (blinding investigators) and 7 (blinding subjects) were not applicable to all of the studies, they are not shown here; N/A, not applicable
